# Supplementary material for: Latitudinal trends in stable isotope signatures and carbon concentrating mechanisms of northeast Atlantic rhodoliths
Source: Copernicus journal article supplement (doi:10.5194/bg-2017-399), 2017-10-17
Supplement: Supplementary file 1 [file bg-2017-399-supplement.pdf]

Table 1. Accession numbers of rhodolith samples sequenced for this manuscript and deposited in ENA/GenBank. A question mark indicates that our sequences were not a perfect match to the database, but we listed the most closely related species.

| Site                     | Species name                       | Accession Number |
|--------------------------|------------------------------------|------------------|
| Mosselbukta              | <i>Lithothamnion glaciale</i>      |                  |
| Mosselbukta              | <i>Lithothamnion lemoineae</i>     |                  |
| Kobbel Fjord (Greenland) | <i>Lithothamnion glaciale</i>      |                  |
| Kobbel Fjord (Greenland) | <i>Lithothamnion erinaceum (?)</i> |                  |
| Akia (Greenland)         | <i>Lithothamnion glaciale</i>      |                  |
| Oslo Fjord               | <i>Lithothamnion glaciale</i>      |                  |
| Oslo Fjord               | <i>Lithothamnion erinaceum (?)</i> |                  |
| Mannin Bay, Ireland      | <i>Phymatolithon purpureum</i>     |                  |
| Mannin Bay, Ireland      | <i>Lithophyllum encrustans</i>     |                  |
| Carraroe, Ireland        | <i>Phymatolithon calcareum</i>     |                  |
| Brest, France            | <i>Lithothamnion corallioides</i>  |                  |
| Brest, France            | <i>Lithothamnion sp.</i>           |                  |
| Las Palmas, Gran Canaria | <i>Phymatolithon spp.</i>          |                  |

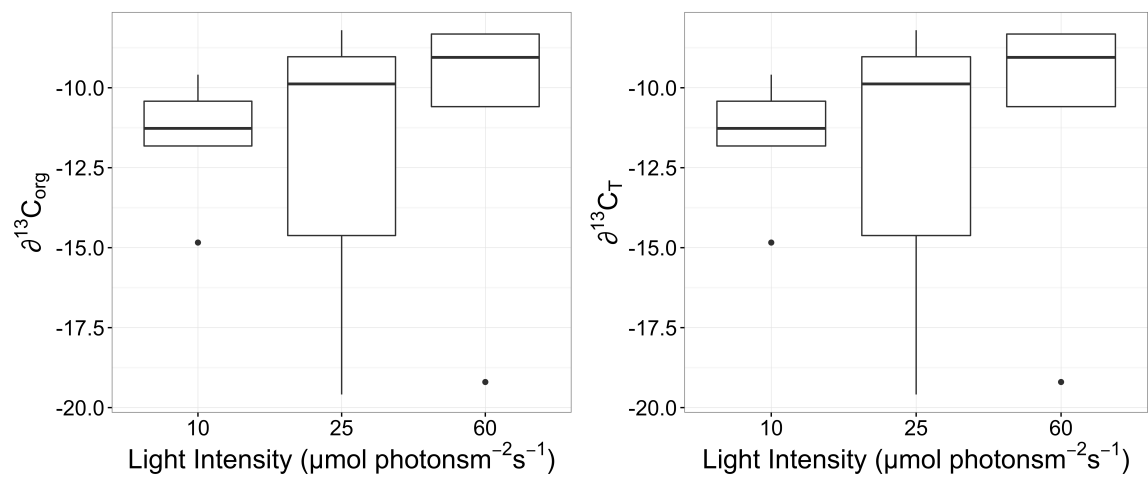

S1. Organic ( $\delta^{13}C_{org}$ ) and total ( $\delta^{13}C_T$ ) stable isotope signatures of *Phymatolithon calcareum* samples exposed to three light levels for one month.

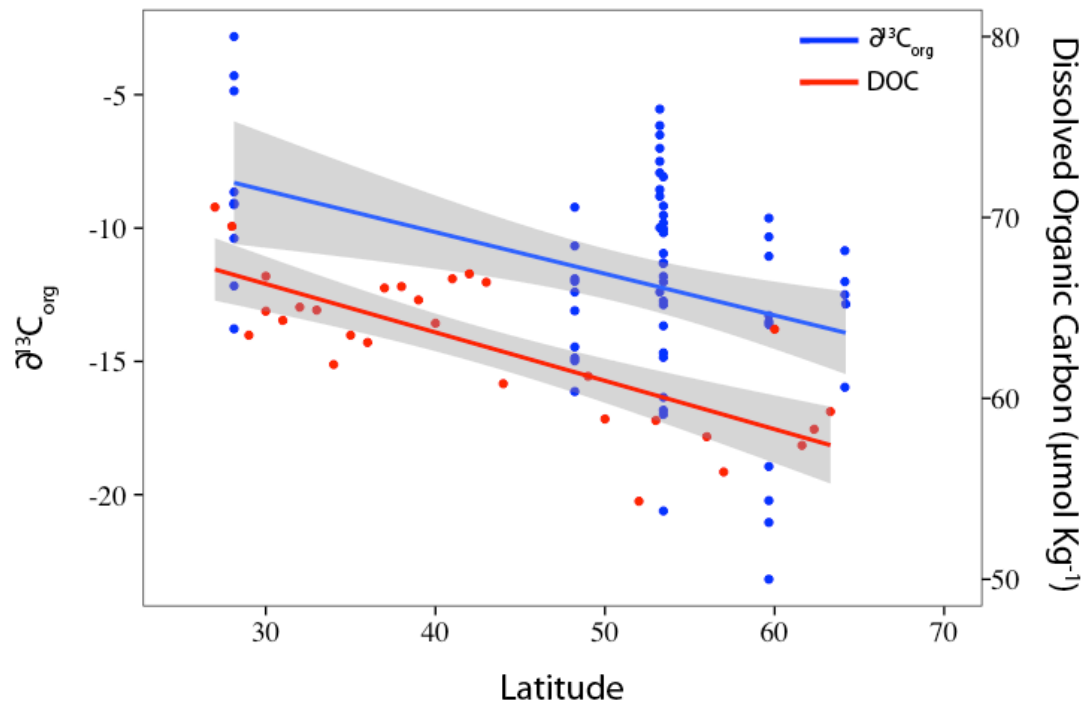

S2. The  $\delta^{13}\text{C}_{\text{org}}$  signatures from our study and surface dissolved organic carbon (DOC) concentrations compiled by GLODAPv2 as a function of Latitude. Both show a decreasing trend with latitude, suggesting there may be an influence of DOC on  $\delta^{13}\text{C}_{\text{org}}$  signatures in the rhodoliths investigated.
